# Supplementary material for: Fostering Appropriate Antibiotic Use in a Complex Intervention: Mixed-Methods Process Evaluation Alongside the Cluster-Randomized Trial ARena
Source: Preprints.org preprint supplement (doi:10.20944/preprints202011.0221.v1), 2020-11-05
Supplement: Supplementary file 1 [file supplementary]

**Supplementary File 1:**

**Supplementary Table 1.** Uptake of study components across groups (T2)

| <b>Component</b>                          | <b>Group A<br/>(n=68)</b> | <b>Group B<br/>(n=67)</b> | <b>Group C<br/>(n=49)</b> | <b>Across Groups<br/>(n=184)</b> |
|-------------------------------------------|---------------------------|---------------------------|---------------------------|----------------------------------|
| E-learning used % (n)                     | 84 (57)                   | 91 (61)                   | 86 (42)                   | 87 (160)                         |
| QC respiratory infections used % (n)      | 75 (51)                   | 88 (59)                   | 76 (37)                   | 80 (147)                         |
| QC urinary tract infections used % (n)    | 75 (51)                   | 82 (55)                   | 78 (38)                   | 78 (144)                         |
| QC pneumonia used % (n)                   | 69 (47)                   | 76 (51)                   | 59 (29)                   | 69 (127)                         |
| QC multi-resistant germs used % (n)       | 63 (43)                   | 73 (49)                   | 59 (29)                   | 66 (121)                         |
| Feedback report used % (n)                | 90 (61)                   | 90 (60)                   | 86 (42)                   | 89 (163)                         |
| Background information used % (n)         | 93 (63)                   | 87 (58)                   | 84 (41)                   | 88 (162)                         |
| Patient flyer German used % (n)           | 68 (46)                   | 96 (64)                   | 74 (36)                   | 79 (146)                         |
| Patient flyer foreign language used % (n) | 22 (15)                   | 49 (33)                   | 31 (15)                   | 34 (63)                          |
| Website used % (n)                        | 35 (24)                   | 28 (19)                   | 27 (13)                   | 30 (56)                          |
| P4P used % (n)                            | 66 (45)                   | 64 (43)                   | 37 (18)                   | 58 (106)                         |
| Public campaign noticed % (n)             | 47 (32)                   | 49 (33)                   | 45 (22)                   | 47 (87)                          |
| Social media noticed % (n)                | 6 (4)                     | 6 (4)                     | 8 (4)                     | N/A                              |
| Tablet device % (n)                       | N/A                       | 33 (22)                   | N/A                       | N/A                              |
| Interdisciplinary QC % (n)                | N/A                       | N/A                       | 57 (28)                   | N/A                              |
| Computerized decision support tool % (n)  | N/A                       | N/A                       | 31 (15)                   | N/A                              |

N/A = not applicable

**Supplementary Table 2.** MAs perspective on integrating study components and newly gained knowledge (T2)

| <b>Integrating study components into practice routines was associated with great effort</b> | <b>Agree</b> | <b>Neutral</b> | <b>Disagree</b> |
|---------------------------------------------------------------------------------------------|--------------|----------------|-----------------|
| Flyer German n (%)                                                                          | 4 (6.9)      | 6 (10.3)       | 47 (81.0)       |
| Flyer Foreign n (%)                                                                         | 6 (10.3)     | 7 (12.1)       | 38 (65.5)       |
| Website n (%)                                                                               | 14 (24.1)    | 17 (29.3)      | 23 (39.7)       |
| Social Media Content n (%)                                                                  | 20 (34.5)    | 17 (29.3)      | 15 (25.9)       |
| Public campaign n (%)                                                                       | 17 (29.3)    | 18 (31.0)      | 17 (29.3)       |
| Tablet device n (%)                                                                         | 29 (50.0)    | 8 (13.8)       | 17 (29.3)       |
|                                                                                             |              |                |                 |
| <b>Transferring newly gained knowledge was associated with great effort</b>                 | <b>Agree</b> | <b>Neutral</b> | <b>Disagree</b> |
| Content of online training n (%)                                                            | 9 (15.5)     | 9 (15.5)       | 38 (65.5)       |
| Content of quality circles n (%)                                                            | 13 (22.4)    | 16 (27.6)      | 27 (46.6)       |
| Content of feedback reports n (%)                                                           | 13 (22.4)    | 14 (24.1)      | 30 (51.7)       |
| Content of background information n (%)                                                     | 11 (19.0)    | 14 (24.1)      | 30 (51.7)       |

**Supplementary Table 3.** Physician perspective on new impulses provided by study components (T2)

| <b>The intervention component provided new impulses</b> |              |          |          |                |          |          |                 |          |          |
|---------------------------------------------------------|--------------|----------|----------|----------------|----------|----------|-----------------|----------|----------|
|                                                         | <b>Agree</b> |          |          | <b>Neutral</b> |          |          | <b>Disagree</b> |          |          |
| <b>Group</b>                                            | <b>A</b>     | <b>B</b> | <b>C</b> | <b>A</b>       | <b>B</b> | <b>C</b> | <b>A</b>        | <b>B</b> | <b>C</b> |
| Online Training %                                       | 48.5         | 59.7     | 40.8     | 25.0           | 19.4     | 18.4     | 22.1            | 16.4     | 34.7     |
| Quality circles %                                       | 72.1         | 83.6     | 79.6     | 14.7           | 9.0      | 10.2     | 10.3            | 3.0      | 6.1      |
| Feedback report %                                       | 58.8         | 65.7     | 55.1     | 30.9           | 22.4     | 34.7     | 8.8             | 7.5      | 6.1      |
| Background information %                                | 73.5         | 68.7     | 73.5     | 17.6           | 19.4     | 12.2     | 7.4             | 7.5      | 8.2      |
| Patient flyer German %                                  | 35.3         | 53.7     | 53.1     | 17.6           | 28.4     | 24.5     | 39.7            | 14.9     | 20.4     |
| Patient Flyer foreign %                                 | 13.2         | 19.4     | 22.4     | 8.8            | 26.9     | 26.5     | 64.7            | 40.3     | 40.8     |
| Website %                                               | 14.7         | 14.9     | 20.4     | 16.2           | 19.4     | 18.4     | 61.8            | 52.2     | 51.0     |
| Social Media %                                          | 5.9          | 4.5      | 6.1      | 1.5            | 13.4     | 2.0      | 83.8            | 71.6     | 75.5     |
| Public campaign %                                       | 26.5         | 26.9     | 36.7     | 16.2           | 29.9     | 20.4     | 51.5            | 35.8     | 28.6     |
| Pay for performance %                                   | 32.4         | 37.3     | 30.6     | 16.2           | 17.9     | 16.3     | 42.6            | 32.8     | 40.8     |
| Tablet device %                                         | N/A          | 9.0      | N/A      | N/A            | 19.4     | N/A      | N/A             | 61.2     | N/A      |
| Interdisciplinary quality circles %                     | N/A          | N/A      | 53.1     | N/A            | N/A      | 16.3     | N/A             | N/A      | 20.4     |
| Decision support tool %                                 | N/A          | N/A      | 16.3     | N/A            | N/A      | 14.3     | N/A             | N/A      | 49.0     |

N/A = not applicable

## **Supplementary File 2: Interview guide physicians (translated)**

### **A – Use of antibiotics**

Describe regular course of action when taking therapy decisions for/against antibiotics regarding patients with acute non-complicated infections

- Influence of patient preferences
- Methods or strategies in use (delayed prescribing?)

### **B – Effects of the quality improvement program with regard to patient care**

Support of therapy decisions by provided intervention components

- Which? / Why? / Reasons / necessary changes in daily practice
- Components not used / Tailoring of components to match workflow

Influence of study participation on therapy decisions

- Changes in attitude / Changes in physician-patient conversation

### **C- Contextual factors – primary care network**

Structure and offers in your primary care network

Role of network for daily care practice / What has changed since becoming a member?

Reasons for becoming a member

How is peer exchange organized in your network?

- Frequency of peer meetings and exchange / support for daily practice (challenges)
- Information flow / Organisation of information flow
- Information exchange regarding use of antibiotics for acute non-complicated infections

Significance of network membership regarding own course of action concerning patients with acute non-complicated infections

- Possible explanation?

### **D- Contextual factors – general**

Further significant factors /developments regarding care for patients with acute non-complicated infections and prescribing antibiotics

- Structural conditions / Organization of processes

### **E- Closing**

Recommendations for future use of antibiotics in patients with acute non-complicated infections

- Ideas and remarks concerning a further development of the intervention program

What would you like to tell us besides already discussed topics?

## **Supplementary File 3: Interview guide medical assistants (translated)**

### **A – Antibiotic management**

Please describe your range of tasks with regards to patient care in practice.

Which experiences did you make in patients with acute, uncomplicated infections?

- Standardized procedures
- Common strategies (i.e. “delayed prescribing” patterns)

### **B – Effects of the quality improvement program with regard to patient care**

Support of therapy decisions by provided intervention components

- Which? / Why? / Reasons / necessary changes in daily practice
- Components not used / Tailoring of components to match workflow

Influence of study participation on therapy decisions

- Changes in attitude / Changes in physician-patient conversation

### **C- Contextual factors – primary care network**

Structure and offers in your primary care network

Role of network for daily care practice / What has changed since becoming a member?

How is peer exchange organized in your network?

- Frequency of peer meetings and exchange / support for daily practice (challenges)
- Information flow / Organisation of information flow
- Information exchange regarding use of antibiotics for acute non-complicated infections

Significance of network membership regarding own course of action concerning patients with acute non-complicated infections

- Possible explanation?

### **D- Contextual factors – general**

Further significant factors /developments regarding care for patients with acute non-complicated infections and prescribing antibiotics

- Structural conditions / Organization of processes

### **E- Closing**

Recommendations for future use of antibiotics in patients with acute non-complicated infections

- Ideas and remarks concerning a further development of the intervention program

What would you like to tell us besides already discussed topics?

## **Supplementary File 4: Interview guide stakeholders (translated)**

### **A – Warm up**

Aspects of interest regarding the use of antibiotics in acute, uncomplicated infections.

- Expectations to the ARena project
- Motivation to participate

### **B – Influence on prescribing behavior**

The rationale of the ARena project is to influence prescribing patterns in acute, uncomplicated infections. Where do you see your tasks and responsibilities regarding this topic?

- Facilitators of this rationale

### **C- Contextual factors – primary care network**

Structure and offers in your primary care network

Role of network for daily care practice

- Arguments to join PCN
- Reasons for physicians to reject membership in PCN
- Influence of PCN membership on individual decision-making of physicians regarding care of patients with acute, uncomplicated infections

PCNs as a platform of peer exchange. How should this exchange ideally be organized?

### **D- Contextual factors – general**

Further significant factors /developments regarding care for patients with acute non-complicated infections and prescribing antibiotics

- Structural conditions / Organization of processes, political developments

### **E- Closing**

Recommendations for future use of antibiotics in patients with acute non-complicated infections

Strategies to sustain the goal of a rational use of antibiotics on the long-term

What would you like to tell us besides already discussed topics?
